# Supplementary material for: A novel Dy3+-activated single-phase white light-emitting phosphor for solid-state lighting
Source: Royal Society of Chemistry journal article supplement (doi:10.1039/d1nj04570a), 2021-01-01
Supplement: d1nj04570a1.pdf [file d1nj04570a1.pdf]

## Supporting Information

### A Novel Dy<sup>3+</sup>-Activated Single-Phase White Light-Emitting Phosphor for Solid-State Lighting

Meng Kuang,<sup>a</sup> Junhao Li,<sup>\*ab</sup> Jinjun Zhang,<sup>c</sup> Jianhong Ding,<sup>a</sup> Ziwang Zhang,<sup>b</sup>  
Kangrong Huang,<sup>d</sup> Nan Yang,<sup>b</sup> Ziheng Zhang,<sup>e</sup> Mingming Yang<sup>a</sup> and Haiyong Ni<sup>\*a</sup>

<sup>a</sup> *Guangdong Province Key Laboratory of Rare Earth Development and Application, Institute of Rare Metals, Guangdong Academy of Sciences, Guangzhou 510630, P. R. China*

<sup>b</sup> *School of Chemistry, Sun Yat-Sen University, Guangzhou 510275, P. R. China*

<sup>c</sup> *State Key Laboratory of Green Building Materials, China Building Materials Academy, Beijing 100024, PR China*

<sup>d</sup> *Department of Obstetrical, Maternal and Child Health Hospital of Longgang District of Shenzhen, Shenzhen 518172, P. R. China*

<sup>e</sup> *Materials and Engineering Science Program, Guangdong Technion-Israel Institute of Technology, Shantou 515063, PR China*

\* Corresponding authors.

*E-mail:* [lijunhao@irmgdas.gd.cn](mailto:lijunhao@irmgdas.gd.cn) (J. Li); [nhygd@163.com](mailto:nhygd@163.com) (H. Ni).

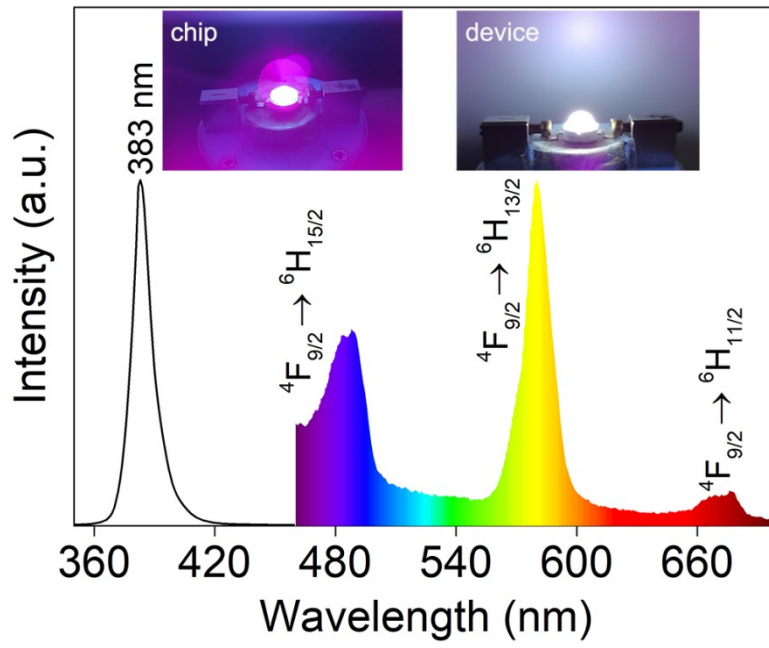

**Fig. S1** Electroluminescence spectrum of SCB:0.03Dy<sup>3+</sup> phosphor-based LED device.

**Table S1** The Sc-O and Ca-O bond lengths of SCB: $x\text{Dy}^{3+}$ 

| SCB:0.03 $\text{Dy}^{3+}$ |             | SCB:0.07 $\text{Dy}^{3+}$ |             | SCB:0.11 $\text{Dy}^{3+}$ |             |
|---------------------------|-------------|---------------------------|-------------|---------------------------|-------------|
| Sc/Dy-O                   | Ca-O        | Sc/Dy-O                   | Ca-O        | Sc/Dy-O                   | Ca-O        |
| 2.2679 (37)               | 2.2966 (31) | 2.1833 (57)               | 2.2327 (65) | 2.1549 (43)               | 2.2884 (44) |
| 2.1692 (51)               | 2.4098 (38) | 2.2928 (44)               | 2.4032 (39) | 2.3024 (54)               | 2.8346 (87) |
| 2.2679 (37)               | 2.7715 (67) | 2.2928 (44)               | 2.2942 (37) | 2.1945 (68)               | 2.3038 (80) |
| 2.0989 (27)               | 2.3605 (56) | 2.1137 (63)               | 2.7863 (77) | 2.3024 (54)               | 2.2884 (87) |
| 2.1027 (55)               | 2.4098 (38) | 2.1097 (29)               | 2.3312 (66) | 2.1549 (43)               | 2.4236 (47) |
| 2.0989 (27)               | 2.2966 (31) | 2.1097 (29)               | 2.2942 (37) | 2.1842 (75)               | 2.1462 (76) |
|                           | 2.2527 (56) |                           | 2.4032 (39) |                           | 2.4236 (47) |

**Table S2** The refined structure parameters of SCB:0.03Dy<sup>3+</sup>.

| Phosphor                 | Atom   | Wyck. | x/a    | y/b  | z/c    | Occ.   | U (Å <sup>2</sup> ) |
|--------------------------|--------|-------|--------|------|--------|--------|---------------------|
|                          | Sc(Dy) | 4c    | 0.3883 | 1.25 | 0.5725 | 1.0000 | 0.018               |
|                          | Ca     | 4c    | 0.5885 | 3/4  | 0.8388 | 1.0000 | 0.004               |
|                          | B1     | 4c    | 0.3120 | 1.25 | 0.8697 | 1.0000 | 0.020               |
| SCB:0.03Dy <sup>3+</sup> | O1     | 4c    | 0.5036 | 3/4  | 0.6178 | 1.0000 | 0.014               |
|                          | O2     | 4c    | 0.2413 | 1.25 | 0.7393 | 1.0000 | 0.003               |
|                          | O3     | 4c    | 0.2595 | 3/4  | 0.4916 | 1.0000 | 0.019               |
|                          | O4     | 4c    | 0.4379 | 1/4  | 0.8682 | 1.0000 | 0.020               |

Space group: Pnma (62) - orthorhombic.

Cell parameters: a = 10.1820 Å, b = 3.3742 Å, c = 9.4137 Å.

V = 323.41 Å<sup>3</sup>, Z = 4.

Reliability factors:  $R_p = 6.80\%$ ,  $wR_p = 8.97\%$ .

**Table S3** The refined structure parameters of SCB:0.07Dy<sup>3+</sup>.

| Phosphor                 | Atom   | Wyck. | x/a    | y/b  | z/c    | Occ.  | U (Å <sup>2</sup> ) |
|--------------------------|--------|-------|--------|------|--------|-------|---------------------|
|                          | Sc(Dy) | 4c    | 0.3891 | 1.25 | 0.5731 | 1.000 | 0.025               |
|                          | Ca     | 4c    | 0.5886 | 3/4  | 0.8394 | 1.000 | 0.001               |
|                          | B1     | 4c    | 0.3103 | 1.25 | 0.8716 | 1.000 | 0.026               |
| SCB:0.07Dy <sup>3+</sup> | O1     | 4c    | 0.5052 | 3/4  | 0.6201 | 1.000 | 0.024               |
|                          | O2     | 4c    | 0.2397 | 1.25 | 0.7395 | 1.000 | 0.005               |
|                          | O3     | 4c    | 0.2566 | 3/4  | 0.4923 | 1.000 | 0.030               |
|                          | O4     | 4c    | 0.4383 | 1/4  | 0.8661 | 1.000 | 0.034.              |

Space group: Pnma (62) - orthorhombic.

Cell parameters: a = 10.1801 Å, b = 3.3812 Å, c = 9.4154 Å.

$V = 324.09 \text{ Å}^3$ ,  $Z = 4$ .

Reliability factors:  $R_p = 6.33\%$ ,  $wR_p = 8.04\%$ .

**Table S4** The refined structure parameters of SCB:0.11Dy<sup>3+</sup>.

| Phosphor                 | Atom   | Wyck. | x/a    | y/b  | z/c    | Occ.  | U (Å <sup>2</sup> ) |
|--------------------------|--------|-------|--------|------|--------|-------|---------------------|
|                          | Sc(Dy) | 4c    | 0.3880 | 1.25 | 0.5735 | 1.000 | 0.032               |
|                          | Ca     | 4c    | 0.5877 | 3/4  | 0.8404 | 1.000 | -0.002              |
|                          | B1     | 4c    | 0.3178 | 1.25 | 0.8830 | 1.000 | 0.018               |
| SCB:0.11Dy <sup>3+</sup> | O1     | 4c    | 0.5082 | 3/4  | 0.6294 | 1.000 | 0.049               |
|                          | O2     | 4c    | 0.2397 | 3/4  | 0.4937 | 1.000 | 0.008               |
|                          | O3     | 4c    | 0.2538 | 3/4  | 0.4937 | 1.000 | 0.035               |
|                          | O4     | 4c    | 0.4377 | 1/4  | 0.8599 | 1.000 | 0.038               |

Space group: Pnma (62) - orthorhombic.

Cell parameters: a = 10.1923 Å, b = 3.3856 Å, c = 9.4187 Å.

$V = 325.01 \text{ Å}^3$ ,  $Z = 4$ .

Reliability factors:  $R_p = 5.97\%$ ,  $wR_p = 8.06\%$ .
